# Supplementary material for: Comparison of intranasal and intramuscular naloxone in opioid overdoses managed by ambulance staff: a double‐dummy, randomised, controlled trial
Source: PubMed Central journal article supplement — Addiction. 2022 Feb 8;117(6):1658–67. doi: 10.1111/add.15806 (PMC9302677; doi:10.1111/add.15806), 2022-02-08

# SUPPLEMENTARY APPENDIX

## NTNU Intranasal Naloxone Trial

Double blinded, double dummy, randomised controlled trial of intranasal naloxone for pre- hospital use

Protocol Identification Number: NINA- 1

EudraCT Number: 2016-004072-22

SPONSOR:

Øystein Risa, Head of Department

Department of Circulation and Medical Imaging, Norwegian  
University of Science and Technology (ISB, NTNU)

Box 8905 MTFS

7491 Trondheim, Norway

Tel: (+47) 92613734

E-mail: oystein.risa@ntnu.no

COORDINATING  
INVESTIGATOR (CI):

Arne Kristian Skulberg, MD, PhD

Department of Circulation and Medical Imaging, Norwegian Uni  
and Technology (ISB, NTNU)

Box 8905 MTFS

7491 Trondheim, Norway

Tel: (+47) 93083544

E-mail: arne.skulberg@ntnu.no

**Supplementary appendix**

**Date: 10<sup>th</sup> FEB 2022**

|                                                                                                |           |
|------------------------------------------------------------------------------------------------|-----------|
| <b>List of investigators</b>                                                                   | <b>3</b>  |
| <b>List of local study coordinators</b>                                                        | <b>4</b>  |
| <b>List of user participation board members</b>                                                | <b>4</b>  |
| <b>List of Data Monitoring and Safety Committee (DMSC) members</b>                             | <b>4</b>  |
| <b>Table S1: Full list of inclusion and exclusion criteria</b>                                 | <b>5</b>  |
| <b>Table S2: Primary and secondary endpoints</b>                                               | <b>5</b>  |
| <b>Table S3: Reasons for participants to be excluded from the Full Analysis Set</b>            | <b>6</b>  |
| <b>Table S4: Baseline characteristics of Full analysis set (FAS) and Excluded participants</b> | <b>7</b>  |
| <b>Table S5: Post hoc adjusted estimates of primary endpoint</b>                               | <b>8</b>  |
| <b>Table S6: Results prespecified secondary endpoints</b>                                      | <b>9</b>  |
| <b>Table S7: Baseline characteristics of included individuals</b>                              | <b>11</b> |
| <b>Table S8: Reasons to exclude participants</b>                                               | <b>12</b> |
| <b>Figure S1: Flow chart of procedure for informed consent</b>                                 | <b>13</b> |
| <b>Figure S2: Flow chart trial procedure during study visit</b>                                | <b>14</b> |
| <b>Figure S3: Photo double dummy kit</b>                                                       | <b>15</b> |
| <b>Figure S4 Subgroup analysis</b>                                                             | <b>16</b> |
| <b>Figure S5: Dichotomous secondary endpoints</b>                                              | <b>17</b> |
| <b>Figure S6: Primary end point in Full Analysis Set</b>                                       | <b>17</b> |

## List of investigators

| Name                                      | Main affiliation                                                                                                                                                                                                                                                                                                                    | Role and time period                                                                                                   |
|-------------------------------------------|-------------------------------------------------------------------------------------------------------------------------------------------------------------------------------------------------------------------------------------------------------------------------------------------------------------------------------------|------------------------------------------------------------------------------------------------------------------------|
| <b>Arne Kristian Skulberg</b> , MD, Ph.D. | <ul style="list-style-type: none"> <li>Department of Circulation and Medical Imaging, Faculty of Medicine and Health Sciences, Norwegian University of Science and Technology, Trondheim, Norway</li> <li>Department of Air ambulance Services, Division of Prehospital Services, Oslo University Hospital, Oslo, Norway</li> </ul> | Investigator from 31 Oct 2016 until 1 May 2019<br><br>National coordinating investigator from 1 May 2019 until present |
| <b>Ola Dale</b> , MD, Ph.D.               | <ul style="list-style-type: none"> <li>Department of Circulation and Medical Imaging, Faculty of Medicine and Health Sciences, Norwegian University of Science and Technology, Trondheim, Norway</li> <li>Department of Research and Development, St. Olavs hospital, Trondheim University Hospital, Trondheim, Norway</li> </ul>   | National coordinating investigator from 31 Oct 2016 until 1 May 2019<br><br>Investigator from 1 May 2019 until present |
| <b>Anne Cathrine Braarud</b> , MD, Ph.D.  | <ul style="list-style-type: none"> <li>Department of Ambulance Services, Division of Prehospital Services, Oslo University Hospital, Oslo; Norway</li> </ul>                                                                                                                                                                        | Principal investigator site Oslo University Hospital from 31 Oct 2016 until present                                    |
| <b>Jostein Dale</b> , MD                  | <ul style="list-style-type: none"> <li>Clinic of Emergency Medicine and Prehospital Care, St. Olavs Hospital, Trondheim University Hospital, Trondheim, Norway</li> </ul>                                                                                                                                                           | Principal investigator site St. Olavs Hospital, Trondheim University Hospital from 31 Dec 2018 until present           |
| <b>Sindre Mellesmo</b> , MD               | <ul style="list-style-type: none"> <li>Clinic of Emergency Medicine and Prehospital Care, St. Olavs Hospital, Trondheim University Hospital, Trondheim, Norway</li> </ul>                                                                                                                                                           | Principal investigator site St. Olavs Hospital, Trondheim University Hospital from 31 Oct 2016 until 31 Dec 2018       |
| <b>Ida Tylleskar</b> , MD, Ph.D.          | <ul style="list-style-type: none"> <li>Department of Circulation and Medical Imaging, Faculty of Medicine and Health Sciences, Norwegian University of Science and Technology, Trondheim, Norway</li> </ul>                                                                                                                         | Investigator from 31 Oct 2016 until present                                                                            |
| <b>Fridtjof Heyerdahl</b> , MD, Ph.D.     | <ul style="list-style-type: none"> <li>Department of Air ambulance Services, Division of Prehospital Services, Oslo University Hospital, Oslo; Norway</li> <li>Norwegian Air Ambulance Foundation, Oslo, Norway</li> </ul>                                                                                                          | Investigator from 31st Oct 2016 until present                                                                          |

## List of local study coordinators

**Tore Skålhegg**, paramedic, Oslo University Hospital, Oslo; Norway

**Jan Barstein**, paramedic, St Olavs, Trondheim University Hospital, Trondheim, Norway

## List of user participation board members

The following were signatories to the original ethics committee application 2016. The board has met at different points during the study, with varying representation from different organisations within the field and user-representatives.

**Torstein Bjordal**, Member Foreningen Human Narkotikapolitikk

**Heidi Hansen**, RIO Rusmisbrukernes Interesseorganisasjon

**Siri Getz Sollie**, LAR nett- Norge

**Siv Løvland**, Styremedlem proLAR

**Fredrik Nillson**, RIO Rusmisbrukernes Interesseorganisasjon

**Bettina Blakstad**, Landsforbundet Mot Stoffmisbruk

## List of Data Monitoring and Safety Committee (DMSC) members

**Per Farup**, MD, PhD  
Faculty of Medicine, NTNU

**Jørgen Dahlberg**, MD, PhD  
Akershus University Hospital

**Øyvind Thomassen**, MD, PhD  
Dept. Emergency Medicine/ KSK  
Haukeland University Hospital

**Marissa E. LeBlanc**, PhD  
Oslo Centre for Biostatistics and Epidemiology, Oslo University Hospital

Table S1: Full list of inclusion and exclusion criteria

|                                                                                                                                                                                                                                                                                                                                                                                                                                                                                                                                                                                                                                                                                                                                                                                                                                                                                                                                                         |
|---------------------------------------------------------------------------------------------------------------------------------------------------------------------------------------------------------------------------------------------------------------------------------------------------------------------------------------------------------------------------------------------------------------------------------------------------------------------------------------------------------------------------------------------------------------------------------------------------------------------------------------------------------------------------------------------------------------------------------------------------------------------------------------------------------------------------------------------------------------------------------------------------------------------------------------------------------|
| <p><b>Inclusion criteria (all shall apply):</b></p> <ul style="list-style-type: none"> <li>• Spontaneous respiration below or equal to 8 breaths per minute</li> <li>• Glasgow Coma Scale score below 12/15</li> <li>• Miosis</li> <li>• Palpable carotid or radial arterial pulse</li> </ul>                                                                                                                                                                                                                                                                                                                                                                                                                                                                                                                                                                                                                                                           |
| <p><b>Exclusion criteria (one criterion is enough for exclusion)</b></p> <ul style="list-style-type: none"> <li>• Cardiac arrest</li> <li>• Failure to assist ventilation using mask-bag technique</li> <li>• Facial trauma, epistaxis or visible nasal blockage</li> <li>• Iatrogenic opioid overdose</li> <li>• Suspected participant below 18 years of age</li> <li>• Suspected or visibly pregnant participant</li> <li>• Participant who has received naloxone by any route in the current overdose</li> <li>• Participant in prison or custody by police</li> <li>• Emergency medical staff without training as study workers</li> <li>• No study drug available</li> <li>• Study drug frozen as indicated by the Freeze Watch in the kit or past its expiry date</li> <li>• Deemed unfit for inclusion due to any other cause by the study personnel at the scene, such as an unsafe work environment for the emergency medical staff</li> </ul> |

Table S2: Primary and secondary endpoints

|                     |      |                                                                                                                                                           |
|---------------------|------|-----------------------------------------------------------------------------------------------------------------------------------------------------------|
| Primary endpoint    | 1    | The proportion of participants with a return of spontaneous respiration ( $\geq 10$ breaths per minute) within 10 minutes of administering the study drug |
| Secondary endpoints | 2.1  | Time from administration of naloxone to respiration $\geq 10$ breaths per minute                                                                          |
|                     | 2.2  | Changes in oxygen saturation and level of consciousness measured by the Glasgow Coma Scale (GCS)                                                          |
|                     | 2.3  | Suitability of the spray device in a pre-hospital setting                                                                                                 |
|                     | 2.4  | Overdose complications                                                                                                                                    |
|                     | 2.5  | Opioid withdrawal reactions                                                                                                                               |
|                     | 2.6  | Adverse reactions to the naloxone formulation                                                                                                             |
|                     | 2.7  | Need for rescue naloxone                                                                                                                                  |
|                     | 2.8  | Rebound opioid intoxication within 12 hours of inclusion                                                                                                  |
|                     | 2.9  | Reasons not to give rescue naloxone to non-responders                                                                                                     |
|                     | 2.10 | Follow-up after care                                                                                                                                      |

Table S3: Reasons for participants to be excluded from the Per Protocol Set to Full Analysis Set

| Centre                                  | Database number | Description of deviation                                                                                                                                   | Treatment arm          |
|-----------------------------------------|-----------------|------------------------------------------------------------------------------------------------------------------------------------------------------------|------------------------|
| Oslo University Hospital                | 01-018          | 1 mL intramuscular, rather than 2 mL administered                                                                                                          | Intramuscular naloxone |
| Oslo University Hospital                | 01-048          | Administered study drug despite Glasgow Coma Score = 12/15                                                                                                 | Intranasal naloxone    |
| Oslo University Hospital                | 01-221          | Freeze watch released prior to drug administration. Patient should have been excluded                                                                      | Intramuscular naloxone |
| Oslo University Hospital                | 01-274          | 1 mL intramuscular, rather than 2 mL administered                                                                                                          | Intramuscular naloxone |
| Oslo University Hospital                | 01-592          | Freeze watch released prior to drug administration. Patient should have been excluded                                                                      | Intramuscular naloxone |
| Oslo University Hospital                | 01-686          | Leak between syringe and needle during injection, uncertain amount of study drug administered intramuscularly                                              | Intranasal naloxone    |
| St Olavs, Trondheim University Hospital | 02-094          | Injection administered 45 seconds after nasal spray, not with protocol specification of as simultaneously as possible, and not above 30 seconds difference | Intramuscular naloxone |

## Table S4: Baseline characteristics of Full analysis set (FAS) and Excluded participants

Overdose characteristics for overdoses in the Full analysis set (FAS) vs. those not in the FAS. Patients that did not give consent are not included. Column n\_var gives the number of observations per variable. Mean (SD) of continuous variables are calculated for patients without missing values.

|                                                                   | n var |                                                                            | Excluded patients | Full Analysis set |
|-------------------------------------------------------------------|-------|----------------------------------------------------------------------------|-------------------|-------------------|
| <b>n=</b>                                                         |       |                                                                            | 727               | 208               |
| <b>Centre (%)</b>                                                 | 935   | Oslo University Hospital                                                   | 620 (85.3)        | 193 (92.8)        |
|                                                                   |       | St. Olavs hospital                                                         | 107 (14.7)        | 15 (7.2)          |
| <b>Sex (%)</b>                                                    | 935   | Female                                                                     | 177 (24.3)        | 37 (17.8)         |
|                                                                   |       | Male                                                                       | 534 (73.5)        | 169 (81.2)        |
|                                                                   |       | Unknown                                                                    | 16 (2.2)          | 2 (1.0)           |
| <b>Age, years (mean (SD))</b>                                     | 790   |                                                                            | 41.69 (14.12)     | 37.86 (10.56)     |
| <b>National Identity number known</b>                             |       | Yes                                                                        | Not applicable    | 183               |
|                                                                   |       | No                                                                         | Not applicable    | 25                |
| <b>Follow up after treatment by emergency services</b>            | 935   | Admitted to hospital                                                       | 206 (28.3)        | 22 (10.6)         |
|                                                                   |       | Left at the scene                                                          | 287 (39.5)        | 137 (65.9)        |
|                                                                   |       | Oslo Accident and Emergency Outpatient Clinic (primary care facility)      | 208 (28.6)        | 44 (21.2)         |
|                                                                   |       | Addiction services Oslo University Hospital                                | 11 (1.5)          | 5 (2.4)           |
|                                                                   |       | Trondheim Accident and Emergency Outpatient Clinic (primary care facility) | 5 (0.7)           | 0 (0.0)           |
|                                                                   |       | Dead                                                                       | 1 (0.1)           | 0 (0.0)           |
|                                                                   |       | Other                                                                      | 9 (1.2)           | 0 (0.0)           |
| <b>Received Take Home Naloxone prior to ambulance arrival (%)</b> | 935   | No                                                                         | 642 (88.3)        | 208 (100.0)       |
|                                                                   |       | Yes                                                                        | 85 (11.7)         | 0 (0.0)           |
| <b>Total dose naloxone given by ambulance (mean (SD))</b>         | 724   | milligram                                                                  | 0.55              | Not applicable    |

## Table S5: Post hoc adjusted estimates of primary endpoint

Table: Estimated marginal risk differences (intramuscular minus intranasal), averaged over the indicated baseline variable which has been adjusted for in the logistic regression model. The same categorization as in Table 1 in the main text is used, unless stated otherwise.

| Adjusted for                                                              | Risk difference (95% Confidence interval) |
|---------------------------------------------------------------------------|-------------------------------------------|
| unadjusted                                                                | 17.7% (8.98%, 26.3%)                      |
| Center                                                                    | 17.5% (8.98%, 26.1%)                      |
| Sex                                                                       | 17.8% (9.09%, 26.5%)                      |
| Age <sup>1</sup>                                                          | 20.2% (10.7%, 29.7%)                      |
| Identity known                                                            | 18.1% (9.44%, 26.8%)                      |
| Baseline respiratory rate                                                 | 20.1% (10.6%, 29.5%)                      |
| Glasgow Coma Score                                                        | 19.9% (10.4%, 29.4%)                      |
| Primary Suspected Drug                                                    | 17.8% (9.15%, 26.5%)                      |
| Benzodiazepines, alcohol, gamma hydroxybutyrate, or other drugs suspected | 19.8% (10.3%, 29.3%)                      |
| Location of overdose                                                      | 16.1% (7.51%, 24.6%)                      |

<sup>1</sup>Categorized in two groups ( $\leq$ mean age,  $>$ mean age).



## Table S6: Results prespecified secondary endpoints

Please consult Figure S4 and Figure S5 for more information

| Continuous secondary endpoint<br>(numbered according to S2)                                                                                                                              | Intramuscular<br>naloxone | Intranasal<br>naloxone     | Mean difference              |
|------------------------------------------------------------------------------------------------------------------------------------------------------------------------------------------|---------------------------|----------------------------|------------------------------|
| Margin (95% confidence interval)                                                                                                                                                         |                           |                            |                              |
| <b>Continuous Secondary Endpoints</b>                                                                                                                                                    |                           |                            |                              |
| 2.1 Changes in Glasgow Coma Scale<br>0 to 10 minutes <sup>2</sup>                                                                                                                        | 8.50 (7.22 to<br>9.77)    | 6.64 (5.20 to<br>8.09)     | 1.86<br>(0.66 to 3.05)       |
| 2.2 Changes in oxygen saturation<br>0 to 10 minutes <sup>2</sup>                                                                                                                         | 21.8 (14.7 to<br>28.8)    | 22.1 (18.3 to<br>25.9)     | -0.33<br>(-11.1 to 10.4)     |
| <b>Dichotomous Secondary Endpoints</b>                                                                                                                                                   |                           |                            |                              |
| Dichotomous secondary endpoint<br>(numbered according to S2)                                                                                                                             | Intramuscular<br>naloxone | Intranasal<br>naloxone     | Difference in risk           |
| 2.3 Overdose complications <sup>1</sup>                                                                                                                                                  | 0.067<br>(0.019 to 0.114) | 0.055<br>(0.008 to 0.101)  | 0.012<br>(-0.053 to 0.077)   |
| 2.4 Opioid withdrawal reaction to naloxone<br>reversal <sup>1</sup>                                                                                                                      | 0.073<br>(0.027 to 0.119) | 0.053<br>(0.008 to 0.099)  | 0.020<br>(-0.046 to 0.085)   |
| 2.5 Adverse reactions to naloxone formulation <sup>1</sup>                                                                                                                               | 0.127<br>(0.068 to 0.185) | 0.149<br>(0.077 to 0.220)  | -0.022<br>(-0.116 to 0.071)  |
| 2.6 Need for rescue naloxone <sup>1</sup>                                                                                                                                                | 0.095<br>(0.038 to 0.151) | 0.288<br>(0.202 to 0.375)  | -0.194<br>(-0.297 to -0.090) |
| 2.7 Recurrence of opioid overdose <sup>1</sup>                                                                                                                                           | 0.035<br>(0.000 to 0.071) | 0.037<br>(-0.011 to 0.086) | -0.002<br>(-0.067 to 0.063)  |
| 2.8 Follow up after care. Risk of being followed-<br>up at hospital or by primary care as opposed to<br>being left at the scene without further health<br>service follow up <sup>1</sup> | 0.310<br>(0.220 to 0.399) | 0.422<br>(0.323 to 0.521)  | -0.112<br>(-0.237 to 0.013)  |

<sup>1</sup>Dichotomous endpoints analysed in the same way as the primary endpoint. <sup>2</sup>Continuous Secondary Outcomes analysed using a linear regression change value as the dependent variable, which is described in detail in the statistical analysis plan.

| <b>Other secondary endpoints without inferential statistical analysis:</b>  |                                                                                                                                                                                                                                                                                                                                                                                                                                            |             |
|-----------------------------------------------------------------------------|--------------------------------------------------------------------------------------------------------------------------------------------------------------------------------------------------------------------------------------------------------------------------------------------------------------------------------------------------------------------------------------------------------------------------------------------|-------------|
| <b>2.9 Suitability of spray device in pre-hospital setting</b>              | No problems with the spray device were reported by study workers in this trial                                                                                                                                                                                                                                                                                                                                                             |             |
| <b>2.10 Rescue dose and route of administration during study visit</b>      | Total dose milligram of rescue naloxone (mean (SD))                                                                                                                                                                                                                                                                                                                                                                                        | 0.61 (0.35) |
| <b>2.11 Regarding reasons not to give rescue naloxone to non-responders</b> | <p>Two participants are documented to have had clinical need for rescue naloxone at 10 minutes, but ambulance personnel did not administer</p> <p>One patient responded while ambulance crew prepared the rescue dose, at approximately 12 minutes</p> <p>One patient regained respiration that satisfied the ambulance personnel, but remained unconscious. The patient was transported to hospital where they received further care.</p> |             |

Table S7: Baseline characteristics of included individuals

|                                                 | level                  | Overall       |
|-------------------------------------------------|------------------------|---------------|
| n                                               |                        | 156           |
| Sex (%)                                         | Female                 | 28 (17.9)     |
|                                                 | Male                   | 126 (80.8)    |
|                                                 | Unknown                | 2 (1.3)       |
| Age (earliest) (Mean (SD))                      |                        | 37.67 (11.20) |
| Number of adverse events in patient (%)         | 0                      | 119 (76.3)    |
|                                                 | 1                      | 29 (18.6)     |
|                                                 | 2                      | 5 (3.2)       |
|                                                 | 3                      | 1 (0.6)       |
|                                                 | 4                      | 1 (0.6)       |
|                                                 | 5                      | 1 (0.6)       |
| Number of serious adverse events in patient (%) | 0                      | 155 (99.4)    |
|                                                 | 1                      | 1 (0.6)       |
| Vital status at end of study (%)                | Alive                  | 156 (100%)    |
| At least one recurrence                         | No                     | 149 (95.5)    |
|                                                 | Yes                    | 7 (4.5)       |
| Number of recurrences                           | 0                      | 149 (95.5)    |
|                                                 | 1                      | 6 (3.8)       |
|                                                 | 2                      | 1 (0.6)       |
| Rescue naloxone needed (ever) (%)               | No                     | 117 (75.0)    |
|                                                 | Yes                    | 39 (25.0)     |
| Rescue naloxone received (ever) (%)             | No                     | 119 (76.3)    |
|                                                 | Yes                    | 37 (23.7)     |
| Treatment received (%)                          | Intranasal naloxone    | 70 (44.9)     |
|                                                 | Intramuscular naloxone | 70 (44.9)     |
|                                                 | Both                   | 16 (10.3)     |
| Number of times included (%)                    | 1                      | 131 (84.0)    |
|                                                 | 2                      | 15 (9.6)      |
|                                                 | 3                      | 6 (3.8)       |
|                                                 | 4                      | 1 (0.6)       |
|                                                 | 5                      | 2 (1.3)       |
|                                                 | 8                      | 1 (0.6)       |

Patient characteristics for patients with overdoses included in the full analysis set

Note: 1) Patient characteristics for individual patients, not describing each event.

2) Serious Adverse Events (SAE) are included in Adverse Events (AE)

Table S8: Reasons to exclude participants

| Criterion                 |                                                                                                                                        | Number of times criterion used |
|---------------------------|----------------------------------------------------------------------------------------------------------------------------------------|--------------------------------|
| <b>Inclusion criteria</b> | Reduced (below or equal to 8 breaths per minute) or absent spontaneous respiration                                                     | 493                            |
|                           | Miosis                                                                                                                                 | 75                             |
|                           | GCS below 12/15                                                                                                                        | 226                            |
|                           | Palpable carotid or radial arterial pulse                                                                                              | 13                             |
| <b>Exclusion criteria</b> |                                                                                                                                        |                                |
|                           | Cardiac arrest                                                                                                                         | 6                              |
|                           | Failure to assist ventilation using mask-bag technique                                                                                 | 7                              |
|                           | Facial trauma or epistaxis or visible nasal blockage                                                                                   | 3                              |
|                           | Latrogenic opioid overdose when opioid is administered in-hospital, or by EMS or other health care workers in the pre-hospital setting | 18                             |
|                           | Suspected participant below 18 years of age                                                                                            | 1                              |
|                           | Suspected or visibly pregnant participant                                                                                              | 0                              |
|                           | Participant that has received naloxone by any route in the current overdose                                                            | 81                             |
|                           | Participant in prison or custody by police                                                                                             | 6                              |
|                           | EMS staff without training as study workers                                                                                            | 104                            |
|                           | No study drug available                                                                                                                | 3                              |
|                           | Study drug frozen as indicated by Freeze Watch in kit or past its expiry date                                                          | 0                              |
|                           | Deemed unfit for inclusion due to any other cause by study personnel at the scene; such as unsafe work environment for EMS             | 87                             |

Please note that each overdose event may have been excluded on multiple grounds, and that the total number of reasons not to include patients exceed the number of cases excluded from the trial.

Figure S1: Flow chart of procedure for informed consent

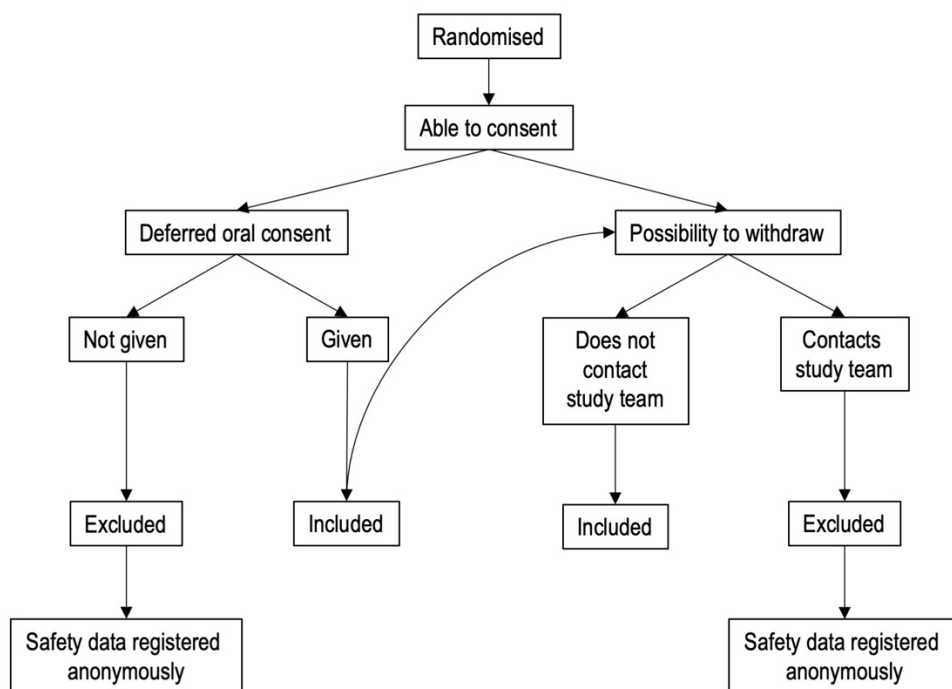

Figure S2: Flow chart trial procedure during study visit

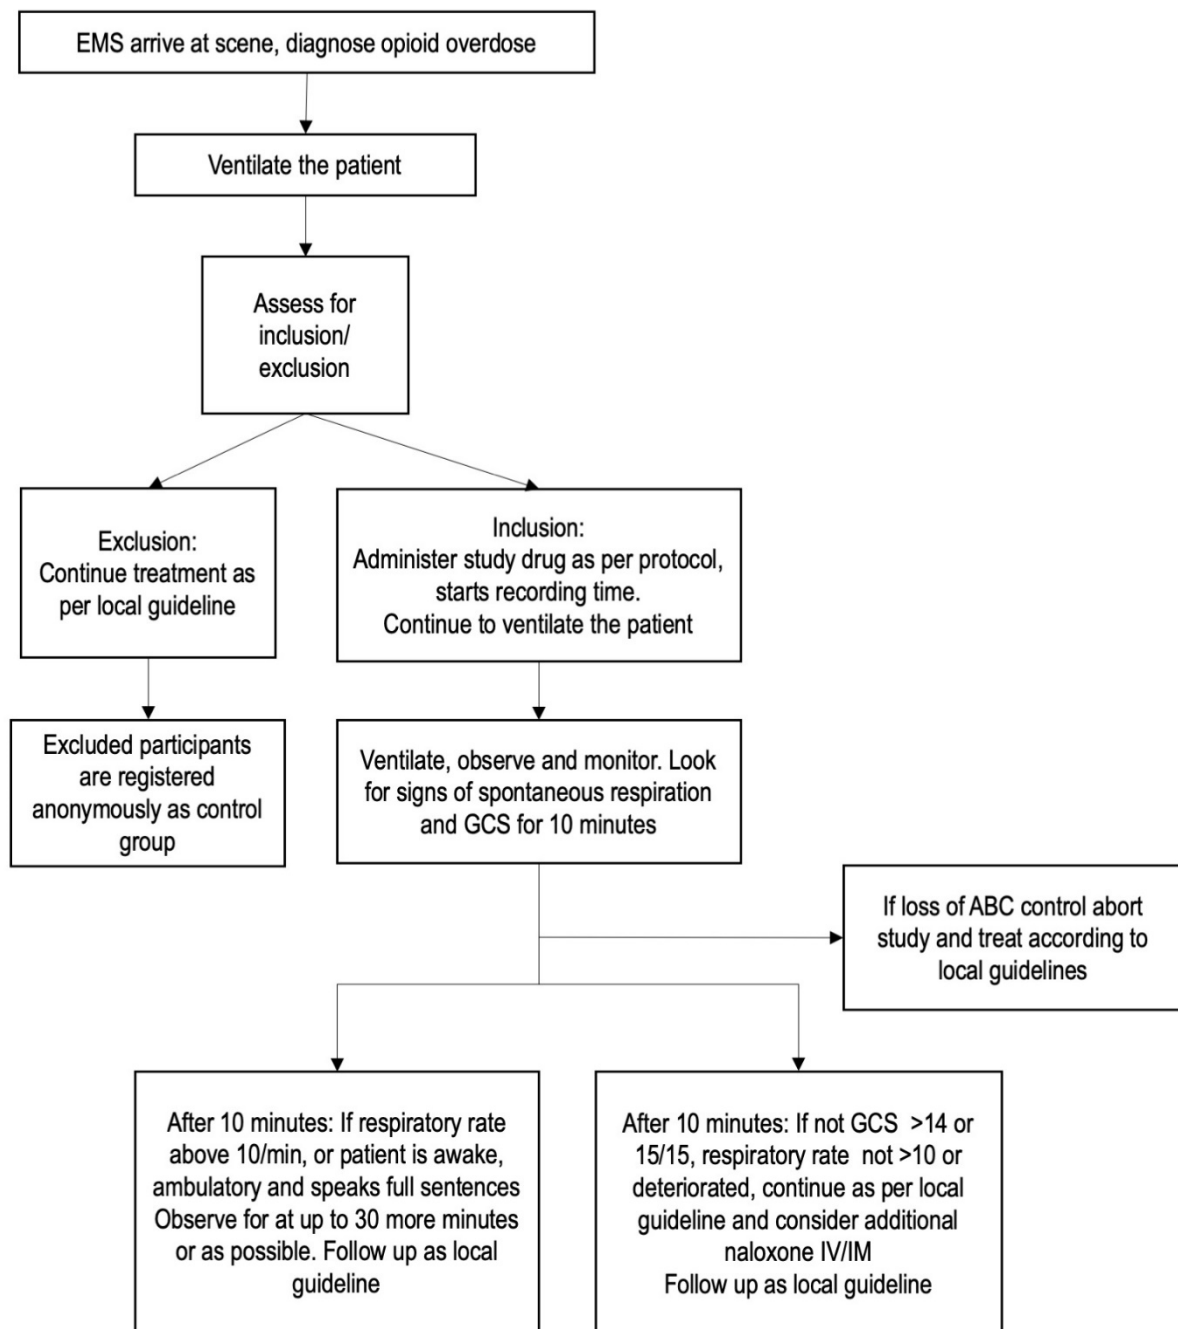

Figure S3: Photo double dummy kit

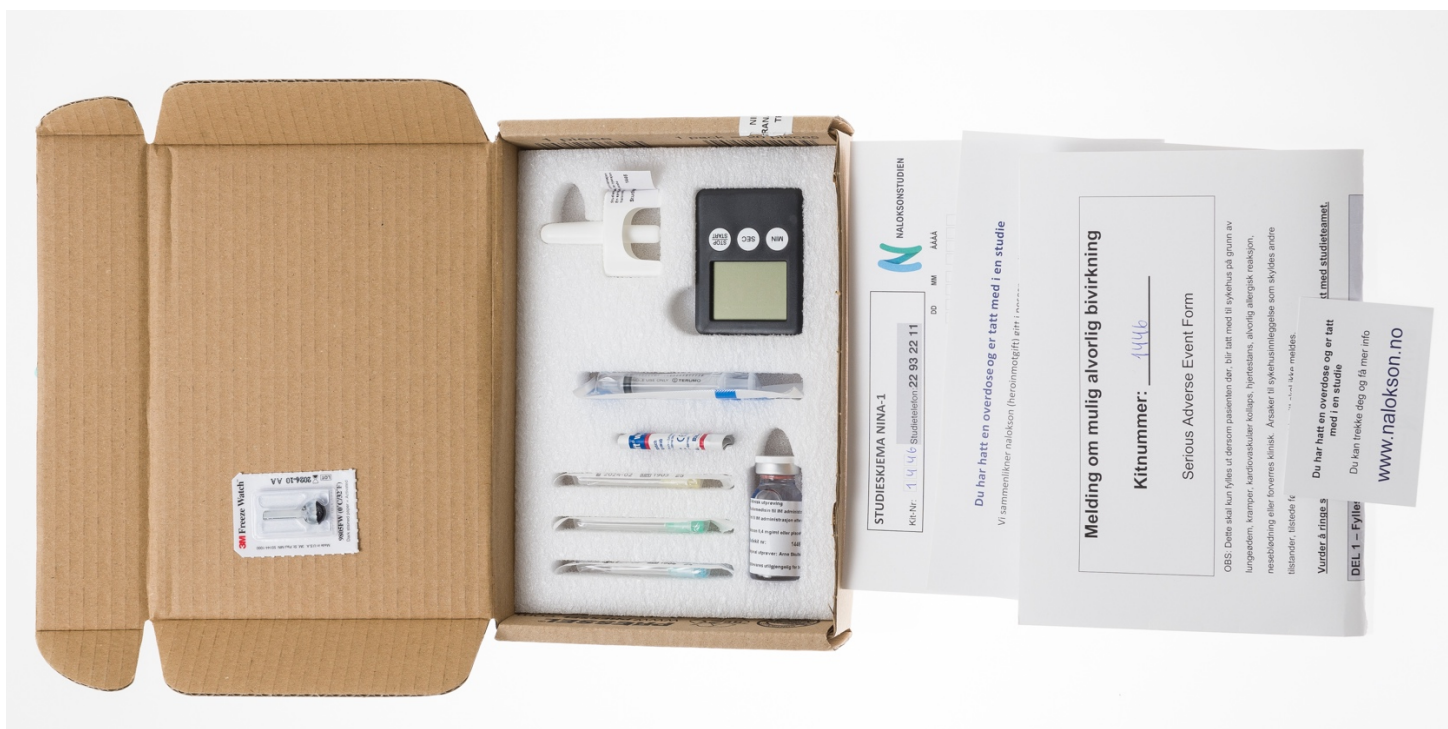

A sealed A5 size cardboard box contained all equipment for the administration of the study medicine, a paper case report form and serious adverse event reporting form, and an information letter for informed consent. All papers were numbered with randomisation numbers. Kits were randomised and assembled by the hospital pharmacy of the Central Norwegian Regional Health Authority at St. Olavs hospital, Trondheim, Norway

Photography: Ine Eriksen, Oslo University Hospital

Figure S4 Subgroup analysis

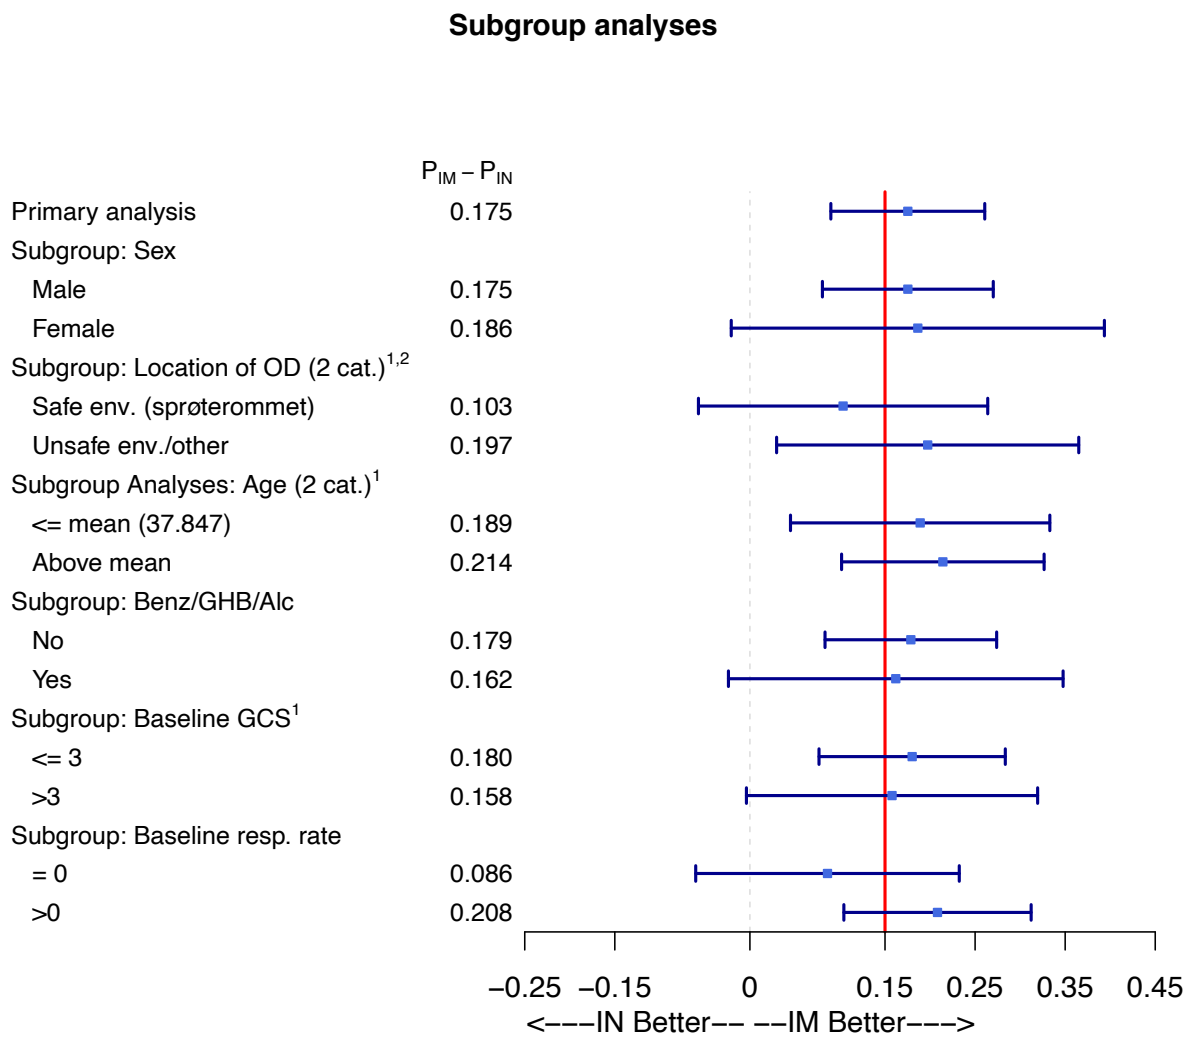

OD= Overdose

Benz= Benzodiazepines

GHB= Gamma Hydroxybutyrate

Alc= Alcohol

GCS= Glasgow Coma Score

Results of the subgroup analysis of the primary endpoint in the per protocol population. The result of the primary analysis is included for completeness. The red vertical line represents the non-inferiority margin.

<sup>1</sup>Exchangable correlation structure not possible due to separation issues, independent correlation structure used instead.

<sup>2</sup>Adjustment for centre not possible due to separation issues



Figure S5: Dichotomous secondary endpoints

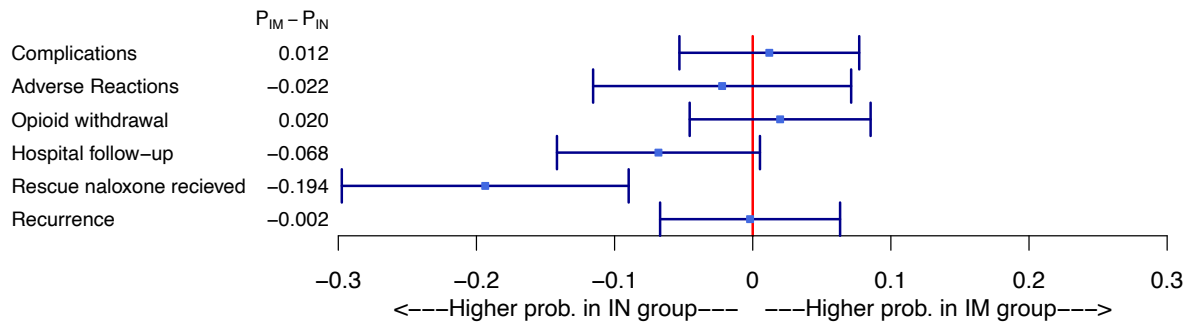

Forest plots describing dichotomous secondary endpoints calculated from the per protocol set.  $P_{IM} - P_{IN}$  indicates the marginal risk difference (Intramuscular group minus intranasal group).

Figure S6: Primary end point in Full Analysis Set

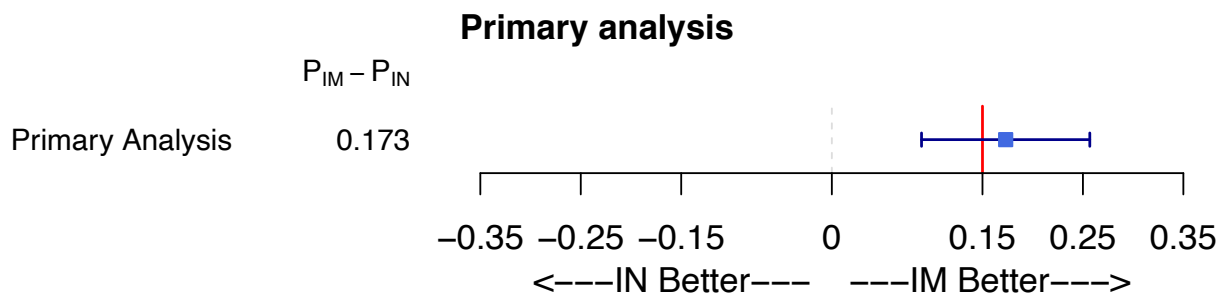

Supplement: ADD-117-1658-s001.pdf [file ADD-117-1658-s001.pdf]
